# Supplementary material
Source: ML conference proceedings conference paper supplement (https://openreview.net/forum?id=uX4dyc7Z5Z)
Supplement: supplementary_material [file supplementary_material.pdf › supplementary_material.pdf]

---

# Supplementary Material for Group-MATES

---

Anonymous Author(s)

Affiliation

Address

email

## 1 A Rollout Length

Table 1: Results on DCLM 1B-1x setting with different rollout length  $T$ .

| $T$       | COMMONSENSE<br>REASONING<br>(3 tasks) | LANGUAGE<br>UNDERSTANDING<br>(6 tasks) | READING<br>COMPREHENSION<br>(3 tasks) | SYMBOLIC<br>PROBLEM SOLVING<br>(5 tasks) | WORLD<br>KNOWLEDGE<br>(5 tasks) | CORE<br>(22 tasks) |
|-----------|---------------------------------------|----------------------------------------|---------------------------------------|------------------------------------------|---------------------------------|--------------------|
| 2         | 0.36687                               | <b>0.40461</b>                         | 0.22536                               | 0.20110                                  | <b>0.30817</b>                  | 0.30685            |
| 20        | 0.36549                               | 0.39901                                | 0.21265                               | <b>0.20501</b>                           | 0.30081                         | 0.30262            |
| 10 (OURS) | <b>0.36997</b>                        | 0.39744                                | <b>0.23922</b>                        | 0.20250                                  | 0.30793                         | <b>0.30747</b>     |

2 In Table 1, we investigate the effect of varying the rollout length  $T$  in Group-MATES, considering  
3 values of 2, 10, and 20. We observe that  $T = 10$  performs slightly better than  $T = 2$ , suggesting that  
4 a moderate increase in rollout length enables our relational data influence model to better capture  
5 long-term effects. However, increasing  $T$  to 20 results in a performance decline, likely due to  
6 the increased complexity of modeling combinatorial effects over longer trajectories, which incurs  
7 additional challenges for the relational data influence model. These results indicate the importance  
8 of selecting an appropriate rollout length that sufficiently reflects group-level data influence while  
9 remaining tractable for the relational data influence model to learn effectively.
